# Supplementary material
Source: MDPI journal article supplement (https://www.mdpi.com/2073-4395/13/4/1041)
Supplement: s1 [file s1]

Table S1 Effects of different treatments on soil physical and chemical properties

| Treatment | DON<br>(mg/kg)             | NO <sub>3</sub> <sup>-</sup> -N<br>(mg/kg) | NH <sub>4</sub> <sup>+</sup> -N<br>(mg/kg) | pH                        | ST<br>(°C)                 |
|-----------|----------------------------|--------------------------------------------|--------------------------------------------|---------------------------|----------------------------|
| CK        | (8.87±0.40) <sup>b</sup>   | (2.22±0.57) <sup>c</sup>                   | (11.07±1.61) <sup>c</sup>                  | (5.96±0.05) <sup>a</sup>  | (11.62±0.23) <sup>b</sup>  |
| N         | (12.11±1.13) <sup>ab</sup> | (12.10±1.82) <sup>a</sup>                  | (19.03±1.93) <sup>abc</sup>                | (6.00±0.13) <sup>a</sup>  | (11.07±0.16) <sup>c</sup>  |
| P         | (8.92±0.30) <sup>b</sup>   | (5.29±1.09) <sup>bc</sup>                  | (11.47±0.52) <sup>bc</sup>                 | (5.95±0.06) <sup>a</sup>  | (11.60±0.22) <sup>b</sup>  |
| D         | (10.06±0.93) <sup>ab</sup> | (3.26±0.95) <sup>c</sup>                   | (11.84±0.98) <sup>bc</sup>                 | (5.98±0.01) <sup>a</sup>  | (12.13±0.79) <sup>a</sup>  |
| NP        | (13.36±1.49) <sup>a</sup>  | (8.13±2.01) <sup>ab</sup>                  | (20.37±3.33) <sup>ab</sup>                 | (5.90±0.73) <sup>ab</sup> | (11.05±0.94) <sup>c</sup>  |
| ND        | (11.88±1.11) <sup>ab</sup> | (9.09±1.65) <sup>ab</sup>                  | (19.05±2.23) <sup>abc</sup>                | (6.03±0.06) <sup>a</sup>  | (11.83±0.17) <sup>ab</sup> |
| NPD       | (12.44±2.90) <sup>a</sup>  | (9.74±1.84) <sup>ab</sup>                  | (28.65±8.80) <sup>a</sup>                  | (5.74±0.08) <sup>b</sup>  | (11.58±0.06) <sup>b</sup>  |

Note: Different letters following the means ± SEs (n = 4) in the same column indicate significant differences (P < 0.05) between treatments. Treatments: control (CK), nitrogen addition (N), phosphorus addition (P), drought (D), nitrogen and phosphorus combined (NP), nitrogen and drought combined (ND), and nitrogen, phosphorus, drought combined (NPD).
